1 **The yeast eIF2 kinase Gcn2 facilitates H<sub>2</sub>O<sub>2</sub>-mediated feedback inhibition of both**  
2 **protein synthesis and ER oxidative folding during recombinant protein**  
3 **production**

4

5 **Veronica Gast<sup>1</sup>, Kate Campbell<sup>1,2</sup>, Cecilia Picazo Campos<sup>1,3</sup>, Martin Engqvist<sup>1</sup>,**  
6 **Verena Siewers<sup>1,2</sup>, and Mikael Molin<sup>1,#</sup>.**

7

8 **Keywords;** Recombinant protein production, heterologous protein production, H<sub>2</sub>O<sub>2</sub>,  
9 hydrogen peroxide, protein kinase Gcn2, Gcn4, ER stress, oxidative stress.

10

11 <sup>1</sup> Department of Biology and Biological Engineering, Chalmers University of  
12 Technology, Gothenburg, Sweden.

13 <sup>2</sup> Novo Nordisk Foundation Center for Biosustainability, Chalmers University of  
14 Technology, Gothenburg, Sweden.

15 <sup>3</sup> Institute for Integrative Systems Biology, I2SysBio, University of Valencia-CSIC, 7,  
16 46980 Paterna, Spain.

17

18 # Corresponding Author: Mikael Molin, Department of Biology and Biological  
19 Engineering, Chalmers University of Technology, Kemivägen 10, SE-412 96  
20 Gothenburg, Sweden. Email: [Mikael.molin@chalmers.se](mailto:Mikael.molin@chalmers.se)

21

22 Running title: Secretion inhibits translation & ER folding via H<sub>2</sub>O<sub>2</sub>

23

24 **Abstract**

25 Recombinant protein production is a known source of oxidative stress. Knowledge of  
26 which ROS are involved or the specific growth phase in which stress occurs however  
27 remains lacking. Using modern, hypersensitive genetic H<sub>2</sub>O<sub>2</sub>-specific probes, micro-  
28 cultivation and continuous measurements in batch culture, we observed H<sub>2</sub>O<sub>2</sub>  
29 accumulation during and following the diauxic shift in engineered *Saccharomyces*  
30 *cerevisiae*, correlating with peak  $\alpha$ -amylase production. In agreement with previous  
31 studies supporting a role of the translation initiation factor kinase Gcn2 in the response  
32 to H<sub>2</sub>O<sub>2</sub>, we find Gcn2-dependent phosphorylation of eIF2 $\alpha$  to increase alongside  
33 translational attenuation in strains engineered to produce large amounts of  $\alpha$ -amylase.  
34 Gcn2 removal significantly improved  $\alpha$ -amylase production in two previously optimized  
35 high-producing strains, but not in the wild-type. Gcn2-deficiency furthermore reduced  
36 intracellular H<sub>2</sub>O<sub>2</sub> levels and the unfolded protein response whilst expression of  
37 antioxidants and the ER disulfide isomerase *PDI1* increased. These results suggest  
38 protein synthesis and ER oxidative folding to be coupled and subject to feedback  
39 inhibition by H<sub>2</sub>O<sub>2</sub>.

40

## 41 **Importance**

42 Reactive oxygen species (ROS) accumulate during recombinant protein production  
43 both in yeast and Chinese hamster ovary cells, two of the most popular organisms  
44 used in the multi-million dollar protein production industry. Here we document  
45 increased H<sub>2</sub>O<sub>2</sub> in the cytosol of yeast cells producing  $\alpha$ -amylase. Since H<sub>2</sub>O<sub>2</sub>  
46 predominantly targets the protein synthesis machinery and activates the translation  
47 initiation factor kinase Gcn2, we removed Gcn2, resulting in increased recombinant  $\alpha$ -  
48 amylase production in two different previously engineered high-producing protein  
49 production strains. Removal of this negative feed-back loop thus represents a  
50 complementary strategy for improving recombinant protein production efforts currently  
51 used in yeast. Gcn2-deficiency also increased the expression of antioxidant genes  
52 and the ER-foldase *PDI1*, suggesting that protein synthesis and ER oxidative folding  
53 are linked and feed-back regulated via H<sub>2</sub>O<sub>2</sub>. Identification of additional components  
54 in this complex regulation may further improve protein production and contribute to the  
55 development of novel protein-based therapeutic strategies.

## 56 **Introduction**

57 The biotechnological role of *S. cerevisiae* in the production of bread and beer has been  
58 long established. In recent decades however, this yeast has also proven effective as  
59 a host for the production of recombinant proteins of significant pharmaceutical value  
60 (1, 2). *S. cerevisiae* is a successful production host predominantly due to its eukaryotic  
61 post-translational modification machinery, its ability to secrete proteins to the media,  
62 as well as its robustness to harsh industrial conditions amongst other traits (2, 3). Many  
63 different strategies have been shown to improve recombinant protein production and  
64 secretion in yeast (4, 5) including the engineering of transport mechanisms in the  
65 secretory pathway, increasing the expression of chaperones, as well as even  
66 expanding the size of the endoplasmic reticulum (ER) (6–9).

67  
68 Recombinant protein production is, however, known to be a significant burden for cells,  
69 due to for example limiting secretory capacity and protein misfolding (10). In  
70 engineered high-producing strains in particular, this burden is speculated to increase  
71 concomitantly with production levels, leading to ER stress (11, 12). To counter this  
72 and the accumulation of unfolded proteins within this organelle, two response  
73 mechanisms can be activated; the unfolded protein response (UPR) and ER-  
74 associated degradation (ERAD). The UPR in *S. cerevisiae* is initiated by Ire1, an ER  
75 membrane protein with active subunits both in the ER lumen and on the cytosolic side.  
76 Upon Ire1 activation by ER stress, an mRNA encoding a transcription factor, Hac1, is  
77 spliced to its active form. Hac1p subsequently moves to the nucleus and activates the  
78 expression of UPR-associated genes (13)

79

80 Besides organelle-specific stress response mechanisms, eukaryotic cells also mount

81 the general stress response. An example of this is the phosphorylation of the  $\alpha$ -subunit  
82 of the eIF2 translation initiator factor (eIF2 $\alpha$ ) (14), which leads to the attenuation of  
83 general translation and a reduction in protein synthesis. Mammals have a total of four  
84 kinases that can phosphorylate eIF2 $\alpha$  in response to various stress signals, *PERK*,  
85 *PRK*, *GCN2*, and *HRI*, whereas *S. cerevisiae* only expresses one of these, *GCN2* (14).  
86 The protein kinase Gcn2 in *S. cerevisiae* is mainly known as the activator for the  
87 general amino acid control (15). Upon depletion of one or multiple amino acids, this  
88 response is activated to counteract amino acid depletion. Besides reducing translation,  
89 a downstream target of Gcn2 within the general amino acid control is the transcription  
90 factor Gcn4. Gcn4 is translationally regulated and activates the expression of genes  
91 involved in the biosynthesis of amino acids amongst other targets (16). However, over  
92 the years more conditions other than amino acid starvation have shown to activate  
93 Gcn2. As these stresses have also led to general translation attenuation, the Gcn2-  
94 mediated response has subsequently been renamed the integrated stress response  
95 (15–20).

96

97 One of the stresses known to activate the protein kinase Gcn2 in *S. cerevisiae* is H<sub>2</sub>O<sub>2</sub>  
98 (21), a signaling molecule, as well as a byproduct of multiple biochemical reactions.  
99 Intracellular levels of H<sub>2</sub>O<sub>2</sub> and other reactive oxygen species (ROS) are usually  
100 maintained below certain thresholds to avoid deleterious effects, such as untargeted  
101 oxidation of cellular components (DNA, lipids and protein) as well as in extreme cases,  
102 cell death (apoptosis) (22–24). When levels of ROS do exceed this threshold, cells are  
103 known to respond by upregulating anti-oxidant proteins, redirecting metabolism as well  
104 as attenuating growth responses such as the protein synthesis machinery to regain  
105 homeostasis (25).

106

107 Oxidative phosphorylation in the mitochondria and protein production in the ER can  
108 both be major sources of ROS (26, 27). Recombinant protein production also has  
109 shown to induce both ER stress and oxidative stress (26, 28). Within the ER, oxidative  
110 stress is suggested to arise due to H<sub>2</sub>O<sub>2</sub> production during protein folding (11, 12).  
111 H<sub>2</sub>O<sub>2</sub> is a direct byproduct of the reduction of oxygen, which occurs during disulfide  
112 bond formation, an iterative process mediated by Pdi1 and Ero1 (15). Oxidative stress  
113 subsequently limits protein secretion in both Chinese hamster ovary (CHO) cells and  
114 yeast (6, 26), with the production capacity of ‘super-producer’ engineered strains most  
115 likely experiencing this limitation as well.

116

117 We hypothesize that recombinant protein production could induce a negative feedback  
118 loop mediated by Gcn2 resulting in the reduction of translation and protein synthesis.  
119 In this study, we provide evidence for the production of H<sub>2</sub>O<sub>2</sub> during recombinant  
120 protein production, using hypersensitive peroxiredoxin-based probes (29).  
121 Furthermore, by removing the H<sub>2</sub>O<sub>2</sub>-activated translational initiation factor kinase  
122 Gcn2 we were able to enhance recombinant  $\alpha$ -amylase production in *S. cerevisiae* by  
123 75%. We find improved recombinant protein production to also correlate with the  
124 induction of the disulfide isomerase encoding gene *PDI1* as well as several  
125 antioxidants and reduced H<sub>2</sub>O<sub>2</sub> levels. Based on this data we propose a model in which  
126 protein synthesis and ER-folding are coupled and subject to feedback-inhibition via  
127 H<sub>2</sub>O<sub>2</sub> and Gcn2.

128

129

130 **Results**

131 *Recombinant  $\alpha$ -amylase production leads to elevated levels of H<sub>2</sub>O<sub>2</sub> in the engineered*  
132 *strain B184*

133 Previous work has shown oxidant production to limit recombinant protein production  
134 and secretion in yeast and CHO cells respectively (6, 26). In both these studies, the  
135 fluorescent probes used to assess oxidant production suffered from low specificity,  
136 with their response to ROS levels being impacted by peroxidase activity as well as  
137 metal ion levels. Information on the specifics of oxidant production during protein  
138 secretion subsequently remains lacking (30). Recombinant protein productivity in  
139 batch cultivation is also speculated to differ across different growth phases. Measuring  
140 this necessitates oxidant production to be monitored continuously (6), enabling subtle  
141 changes in H<sub>2</sub>O<sub>2</sub> to be identified during different phases of cell growth. To address this,  
142 we decided to use peroxiredoxin-linked redox-sensitive (ro) GFP sensors (29) in  
143 combination with micro-cultivation (31), considering that peroxiredoxins are by far the  
144 most H<sub>2</sub>O<sub>2</sub>-reactive proteins in the cell (32). Upon oxidation of the sensor,  
145 peroxiredoxin and redox-relay to the fused roGFP2, and a fluorescent signal excited  
146 at a wavelength of 405 nm is emitted by the sensor; upon sensor reduction this signal  
147 is instead excited at a wavelength of 488 nm. By calculating the ratio of oxidized to  
148 reduced signal (Ox/Red), we were able to compare the internal H<sub>2</sub>O<sub>2</sub> levels in different  
149 strains. We initially started with three sensors, roGFP2-*PfAOP*, roGFP2-*PfAOP*<sup>L109M</sup>,  
150 and roGFP2-Prx1, and investigated their responses to external addition of H<sub>2</sub>O<sub>2</sub> and  
151 DTT (Figure S1) (29, 33). We found the roGFP2-Prx1 sensor (Ox/Red) ratio to  
152 increase upon H<sub>2</sub>O<sub>2</sub> addition and decrease upon DTT addition, whereas both the  
153 roGFP2-*PfAOP* sensors responded mainly to DTT addition (Figure S1). Importantly,  
154 the growth of the strains expressing the roGFP2-Prx1 sensor was also similar to the

155 wildtype (Figure S2). Based on these results, we continued our experiments only with  
156 the roGFP2-Prx1 sensor, considering that this sensor demonstrated a high sensitivity  
157 to endogenous H<sub>2</sub>O<sub>2</sub> levels (responded to DTT), while its signal still increased upon  
158 addition of exogenous H<sub>2</sub>O<sub>2</sub> (Figure S1). Within this setup, we also subtracted yeast  
159 cell autofluorescence from the fluorescent signal of the roGFP2-Prx1 sensor. This  
160 being possible due to our strains harboring the roGFP2-Prx1 sensor and the vector  
161 control plasmid respectively having highly similar growth profiles (Figure S3-S4  
162 Using our selected sensor, we next sought to study the impact of different levels of  
163 recombinant protein production on ROS generation. Here, we made use of B184 and  
164 AACK strains, two commonly used strains for recombinant protein production  
165 purposes. AACK is the 'wildtype' to B184, a strain based on AACK, which has also  
166 been engineered by random UV-mutagenesis to produce a 6-fold higher  $\alpha$ -amylase  
167 titer in batch bioreactors (34, 35).  $\alpha$ -amylase is used biotechnologically to release  
168 fermentable sugars from starch and is a commonly used marker protein to report on  
169 the recombinant protein production capacity in yeast cells (5, 9). We tested both  
170 strains to determine if a difference in ROS production could be observed as a  
171 consequence of their difference in capacity for  $\alpha$ -amylase production. Based on the  
172 determined (Ox/Red) ratios, we found that recombinant  $\alpha$ -amylase production led to  
173 increased H<sub>2</sub>O<sub>2</sub> levels in strain B184 relative to the non-producing strain, with this  
174 increase predominantly occurring in the later stages of growth (Figure 1A). Since B184  
175 demonstrates higher  $\alpha$ -amylase production compared to AACK, the difference in  
176 Ox/Red ratios observed may be related to the amount of recombinant protein  
177 produced (35). In particular, we observed elevated (Ox/Red) ratios from around 25 h  
178 to the end of 96 h cultivation in B184 with recombinant  $\alpha$ -amylase production i.e.,  
179 during and following the diauxic shift (Figure 1A). Furthermore, (Ox/Red) ratios levels



180 exhibited a cell density-dependent pattern in both B184 strains which may be related  
181 to oxygen levels and/or growth phase, as previously observed (Figure S3) (29). In  
182 AACK, the difference with and without  $\alpha$ -amylase production was less pronounced  
183 however with the apparent peak in the (Ox/Red) ratio between 30 h and 50 h most  
184 likely being the result of delayed growth (Figure 1B & S3).

185

186 *The protein kinase Gcn2 is active in B184 both with and without recombinant  $\alpha$ -*  
187 *amylase production.*

188 Previous research suggests that external H<sub>2</sub>O<sub>2</sub> addition activates the protein kinase  
189 Gcn2 leads to a reduction in protein synthesis (21), in part through its phosphorylation  
190 of the  $\alpha$  subunit of the translation initiation factor (eIF2 $\alpha$ ). With the assumption that  
191 eIF2 $\alpha$  would also respond to the increased H<sub>2</sub>O<sub>2</sub> levels detected upon  $\alpha$ -amylase  
192 production, we therefore monitored Gcn2-dependent phosphorylation of eIF2 $\alpha$  in  
193 B184 and AACK  $\pm$   $\alpha$ -amylase expression, by immunoblotting against total and  
194 phosphorylated eIF2 $\alpha$ . Only B184 producing recombinant  $\alpha$ -amylase showed  
195 phosphorylated eIF2 $\alpha$  after 96 h (Figure 2A), whilst the B184 not expressing  $\alpha$ -  
196 amylase showed eIF2 $\alpha$  phosphorylation at the 48 h timepoint only (Figure 2A). AACK  
197 showed none or only minor phosphorylation of eIF2 $\alpha$  at 48 h or 96 h, in agreement  
198 with its redox profile (Figure 2A, 1B). These results indicate that the increased  
199 phosphorylation of eIF2 $\alpha$  in B184 is most likely linked to these strains increased  
200 capacity for  $\alpha$ -amylase production (Figure 2A).

201

202 *The removal of the GCN2 kinase leads to elevated rate of translation and decreased*  
203 *GCN4 expression.*

204 So far, our results indicate Gcn2 protein kinase activity in B184 producing recombinant

205 proteins. To explore this further, we deleted *GCN2* in this strain and monitored how  
206 this would affect its best-known downstream targets, namely genes involved in general  
207 translation and the translation of the transcription factor *GCN4*. The rate of translation  
208 was measured using puromycin, a structural analog of aminoacyl-tRNAs that can be  
209 incorporated into the polypeptide chain but which prohibits further elongation (36). We  
210 included B184 and B184 *gcn2* $\Delta$  while producing  $\alpha$ -amylase. Increased levels of  
211 puromycin-bound protein could be clearly seen in B184 *gcn2* $\Delta$  producing recombinant  
212  $\alpha$ -amylase compared to B184 when *GCN2* is expressed, suggesting that a higher rate  
213 of translation can be achieved when *GCN2* is absent (Figure 2B).

214 Next, we quantified the expression of *GCN4* which, alongside the general translation  
215 rate, is an indicator of Gcn2 activity. Several conditions activate Gcn2-mediated  
216 induction of *GCN4*, most of which are starvation related (18, 37, 38). Under non-  
217 starvation conditions, *GCN4* expression is inhibited through a post-transcriptional  
218 mechanism involving four uORFs that are preferentially translated over the *GCN4*  
219 ORF (38, 39). In contrast, during starvation and Gcn2 activation, the low levels of  
220 ternary complexes between eIF2-GTP and the initiator tRNA-Met, delay pairing with  
221 the AUG start codon sufficiently to bypass the uORFs and instead stimulate *GCN4*  
222 translation (38, 39). The expression of *GCN4* was determined using a luciferase assay  
223 with one construct expressing firefly luciferase under the control of the *GCN4* promoter  
224 and post-transcriptional regulatory regions, and a control renilla luciferase under the  
225 control of a constitutive promoter (40). We verified the functionality of the construct  
226 using chemically induced amino acid starvation (3-aminotriazole, Figure S5). The  
227 removal of the protein kinase Gcn2 in B184 producing recombinant  $\alpha$ -amylase  
228 reduced *GCN4* expression significantly, in agreement with Gcn2 being the major  
229 activator of *GCN4* (Figure 2C) (41). In B184 cells, *GCN4* expression was visible at 24

230 h, however, its levels decreased at time-points during which Gcn2 activity increased  
231 (from 24 h to 48 h, Figure 2C). Taken together, these results show that in B184  
232 producing recombinant  $\alpha$ -amylase, the protein kinase Gcn2 is active in reducing both  
233 overall translation whereas the expression of Gcn4, in contrast, is reduced.

234

235 *The removal of the protein kinase Gcn2 leads to an improvement of recombinant  $\alpha$ -*  
236 *amylase production in two engineered production strains.*

237 Having confirmed the activity of the protein kinase Gcn2 in B184 we wanted to quantify  
238 its impact on recombinant  $\alpha$ -amylase production. We removed GCN2 in two additional  
239 strains, AACK, as well as another strain, K17, which is optimized for  $\alpha$ -amylase  
240 production and secretion by targeted engineering (5). K17 like B184 is engineered to  
241 improve protein production and reaches 5-fold  $\alpha$ -amylase titers in bioreactors  
242 compared to the AACK strain (5, 35). Using these three strains both with and without  
243  $\alpha$ -amylase production, we quantified the amount of  $\alpha$ -amylase produced, selecting  
244 time-points that reflected the different stages of growth. We cultivated the *gcn2 $\Delta$*  and  
245 the control strains expressing recombinant  $\alpha$ -amylase, for 96 h and sampled  $\alpha$ -  
246 amylase after 24 h, 48 h, and 96 h. These results showed that final  $\alpha$ -amylase titer in  
247 the media increased by approx. 2-fold in B184 upon GCN2 removal (Figure 3A). Due  
248 to its previous engineering, B184 is already acknowledged as an efficient recombinant  
249 protein producer, particularly in combination with the CPOT expression plasmid [38],  
250 [39]. In comparison, for K17 *gcn2 $\Delta$* , the  $\alpha$ -amylase titer increased 30%. The removal  
251 of the protein kinase Gcn2 also showed to have the highest impact on  $\alpha$ -amylase  
252 production for all strains measured between 48 h and 96 h of cultivation (Figure 3A).  
253 Finally, for AACK, the removal of the protein kinase Gcn2 had no impact  $\alpha$ -amylase  
254 titer at any timepoint during the 96 h of cultivation (Figure 3A). In addition to  $\alpha$ -amylase

255 productivity, we observed a significant increase in dry weight for B184 *gcn2Δ* while  
256 producing recombinant  $\alpha$ -amylase, in comparison to B184 *GCN2*, (Figure 3B) which  
257 agrees with this strain having a relatively higher translation rate (Fig. 2B).

258

259 Lastly, we determined the exponential growth rates for all three strains with and  
260 without *gcn2Δ*. Here, growth rates significant increased for B184 *gcn2Δ* and K17  
261 *gcn2Δ* whilst a decrease was observed for AACK *gcn2Δ* (Figure 3C). Therefore  
262 despite Gcn2 appearing to be beneficial for growth in AACK, for engineered strains  
263 wherein recombinant protein production is optimized for, this protein kinase has  
264 instead a detrimental impact. This supports our previous findings that *GCN2* is active  
265 for longer in engineered B184 strains, most likely due to its response to increased  
266 ROS levels during amylase production (Figure 2A & B, Figure 1A ).

267

268 *The removal of the GCN2 kinase leads to decreased UPR activation whereas PDI1*  
269 *expression is upregulated.*

270 To understand how *GCN2* may be linked to ROS production, we continued this study  
271 by examining the unfolded protein response (UPR) and the oxidative stress response,  
272 since these two mechanisms are intricately interconnected and have been previously  
273 linked to the control of translation (43). The UPR response in *S. cerevisiae* is activated  
274 by the Hac1 transcription factor, which itself is post-transcriptionally controlled by a  
275 splicing mechanism induced upon ER stress. Here, the spliced mRNA of *HAC1*, when  
276 translated into its active form leads to it inducing the transcription of the UPR response  
277 genes (13). We therefore measured the degree of *HAC1* mRNA splicing by qPCR to  
278 decipher if the UPR was being activated for our different strains. Interestingly, both  
279 B184 and B184 *gcn2Δ* strains, showed an increase in the *HAC1*<sup>spliced</sup>/*HAC1*<sup>unspliced</sup>

280 mRNA ratio from 24 h to 48 h suggesting that *HAC1* is more active in later stages of  
281 cell growth. When comparing B184 *gcn2Δ* to B184 however, the ratio of  
282 *HAC1*<sup>spliced</sup>/*HAC1*<sup>unspliced</sup> mRNA decreased, both after 24 h and 48 h (Figure 4A),  
283 suggesting this strain experiences less ER stress during  $\alpha$ -amylase production as a  
284 result of *GCN2* deletion.

285 We next selected several transcriptional Hac1 targets to check for their expression  
286 levels following *GCN2* deletion (Figure 4B). Here as anticipated we found that almost  
287 all genes had decreased expression, upon *GCN2* deletion suggesting the UPR was  
288 relatively inactive in these strains. The only exception, however, was *PDI1* which  
289 transcript increased 7-fold after 48 h in the B184 *gcn2Δ* strain. The expression of  
290 *PDI1*'s counterpart in disulphide formation, *ERO1*, was only modestly increased  
291 however (Figure 4B). The higher abundance of the *PDI1* transcript in B184 *gcn2Δ*,  
292 therefore seems independent of the UPR. The other known UPR target genes *KAR2*,  
293 *JEM1*, *EUG1*, *SCJ1*, and *LHS1* (Figure 4B) showed an expression similar to *ERO1*, in  
294 which their expression in B184 *gcn2Δ* was quite similar to in B184. The exceptions  
295 were *KAR2* and *JEM1* (Figure 4B). *KAR2* and *JEM1* showed a decrease in expression  
296 level which correlates with the lower level of *HAC1* splicing (Figure 4A).

297

298 *Removal of the protein kinase Gcn2 leads to reduced H<sub>2</sub>O<sub>2</sub> levels and an upregulation*  
299 *of antioxidant protein expression.*

300 So far our results suggest Gcn2 reduces ER stress during  $\alpha$ -amylase production. As  
301 it is highly likely oxidative stress contributes to overall ER stress due to increased H<sub>2</sub>O<sub>2</sub>  
302 levels during recombinant protein production, we next investigated the impact of Gcn2  
303 on H<sub>2</sub>O<sub>2</sub> production. We used the same setup as before with the Biolector and the  
304 roGFP2-Prx1 sensor to measure H<sub>2</sub>O<sub>2</sub> levels in B184 *gcn2Δ* with and without

305 recombinant  $\alpha$ -amylase production. We added the data of the B184 *gcn2* $\Delta$  expressing  
306  $\alpha$ -amylase and the control to the plots shown in Figure 1A to provide the overview  
307 (Figure 5A). Across the duration of the entire cultivation the H<sub>2</sub>O<sub>2</sub> levels were  
308 comparatively higher relative to B184 engineered for recombinant  $\alpha$ -amylase  
309 production with *GCN2* intact (Figure 5A). In the control without recombinant  $\alpha$ -amylase  
310 production the removal of *GCN2* does not impact the (Ox/Red) ratio during the  
311 cultivation. B184 *gcn2* $\Delta$  shows a (Ox/Red) ratio profile more similar to the controls.  
312 Considering that B184 *gcn2* $\Delta$  can achieve significantly higher amylase titers than  
313 when *GCN2* is expressed (Figure 3A), it is possible the concomitant lower H<sub>2</sub>O<sub>2</sub> levels  
314 we observe is reflecting increased protein production in the ER, without the ER stress  
315 response being triggered by *GCN2*.

316 Among our B184 strains, growth profiles with the roGFP2-Prx1 sensor and the control  
317 plasmid without the sensor were comparable (Figure S6), highlighting that the  
318 inclusion of this sensor does not introduce any confounding effects in our analysis. In  
319 order to evaluate to what extent the decreased H<sub>2</sub>O<sub>2</sub> levels observed in *gcn2* $\Delta$  cells  
320 reflected altered antioxidant levels, we next determined the expression of antioxidant  
321 proteins by qPCR. Except for *CTT1* a clear increase in relative expression levels could  
322 be seen for all anti-oxidant related genes tested, especially after 48 h when comparing  
323 B184 *gcn2* $\Delta$  to B184 (Figure 5B). *SRX1*, *fRMs*, *TRX2*, and *TSA1* all showed elevated  
324 expression levels in B184 *gcn2* $\Delta$  compared to B184. The upregulation of most of the  
325 antioxidant genes we tested in B184 *gcn2* $\Delta$ , also correlates with this strain having  
326 lower overall levels of H<sub>2</sub>O<sub>2</sub> (Figure S7). Taken together with results for B184 *GCN2*  
327 these results suggests that the presence of the protein kinase Gcn2 reduces the wild-  
328 type oxidative stress response.

329

330 *The removal of the Gcn2 kinase increases survival in recombinant  $\alpha$ -amylase*  
331 *producing B184.*

332 ER stress has previously been suggested to increase the levels of mitochondrially-  
333 derived ROS, exerting a negative effect on cell survival (28). We therefore tested if the  
334 removal of *GCN2* with and without recombinant  $\alpha$ -amylase production affected  
335 survival as a consequence of its impact on ER regulated UPR (Figure 4), H<sub>2</sub>O<sub>2</sub> levels  
336 (Figure 5A), and on antioxidant gene expression (Figure 5B) in the cell. Using  
337 propidium iodide (PI) staining in combination with flow cytometry we could visualize  
338 and quantify the proportion of dead cells in our strain cell populations, whereby high  
339 fluorescence sub-populations represent dead cells and low fluorescence  
340 subpopulations indicate living cells. All strains showed 100% viability during the first  
341 96 h of cultivation (Figure S7), after 13 days, however, the fraction of surviving cells  
342 increased in the B184 *gcn2* $\Delta$  cultures upon recombinant  $\alpha$ -amylase production  
343 compared to B184 (Figure 5C) but not in the control without recombinant protein  
344 production (Figure 5D).

345

## 346 **Discussion**

347 This work examined the roles of oxidants on recombinant protein production in yeast.  
348 We provide evidence for the accumulation of cytosolic H<sub>2</sub>O<sub>2</sub> in cells engineered to  
349 produce high levels of  $\alpha$ -amylase preferentially during the diauxic shift and post-  
350 diauxic shift growth phases. These are time-points during which amylase production  
351 peaks, suggesting that increased H<sub>2</sub>O<sub>2</sub> is indeed a result of recombinant protein  
352 production. (6, 26)

353

354 Interestingly, a recent study found that increased endogenous H<sub>2</sub>O<sub>2</sub> levels  
355 preferentially reacts with cysteines in proteins of the protein synthesis machinery,  
356 potentially explaining its inhibitory effect on protein production (44). Furthermore, H<sub>2</sub>O<sub>2</sub>  
357 has been shown to repress protein synthesis in part through activating the  
358 eIF2 $\alpha$  kinase Gcn2 (21). In agreement with these studies, we found that the protein  
359 kinase Gcn2 was activated in engineered *S. cerevisiae* strains producing recombinant  
360  $\alpha$ -amylase, downregulating translation and reducing  $\alpha$ -amylase production (Figure 2A,  
361 2B & 3A). These data are consistent with a model in which H<sub>2</sub>O<sub>2</sub>, accumulating as a  
362 result of recombinant protein production and secretion, represses cytosolic translation  
363 via the translation initiation factor (eIF2) kinase Gcn2 (Figure 6). In support for this  
364 model, the phosphorylation of eIF2 increases in a Gcn2-dependent manner upon  $\alpha$ -  
365 amylase production (Figure 2A). Furthermore, cytosolic translation is maintained to a  
366 higher degree in Gcn2-deficient cells producing amylase (Figure 2B). Unexpectedly,  
367 however, we found that both the ER specific UPR and oxidative stress responses were  
368 affected by the removal of *GCN2*. Whereas the UPR decreased in cells lacking Gcn2  
369 (Figure 4B), the antioxidant response was increased (Figure 5B) correlating with  
370 decreased cytosolic H<sub>2</sub>O<sub>2</sub> (Figure S7).



371

372 *Reduction of the UPR in B184 gcn2Δ.*

373 The UPR has previously been coupled to elevated H<sub>2</sub>O<sub>2</sub> levels and oxidative stress.  
374 In this work, Haynes et al. observed that in ERAD-deficient cells challenged with  
375 increased levels of misfolded proteins, the removal of the UPR reduced oxidative  
376 stress and improved fitness (28). We observed a decrease in the UPR and reduced  
377 H<sub>2</sub>O<sub>2</sub> levels upon loss of Gcn2. The level of oxidative stress has previously been  
378 thought to be result of folding in the ER (11, 12). This is not coherent with our data,  
379 however, since we also observe an increased  $\alpha$ -amylase production upon Gcn2  
380 removal (Figure 3A). Besides, the UPR target genes show a variable expression  
381 pattern.

382

383 A somewhat surprising finding in this study was the rather strong induction of *PDI1*  
384 (Figure 4B) that appears to be unrelated to the UPR. In particular, we observe an  
385 almost 7-fold induction of the *PDI1* transcript in B184 cells lacking Gcn2 (Figure 4B).  
386 Previous studies have shown overexpression of *PDI1* to have a positive influence on  
387 protein production, e.g. of  $\alpha$ -amylase (5, 34). This indirectly induced overexpression  
388 of *PDI1*, caused by the absence of protein kinase Gcn2, could thus be an additional  
389 explanation for the increase in  $\alpha$ -amylase production in this strain. The strain B184  
390 indeed carries a chromosomal duplication leading to two copies of the *PDI1* gene in  
391 the genome (34). The mechanism that results in this strong induction of *PDI1* in the  
392 absence of Gcn2 is, presently, unknown. Two independent large-scale transcriptomic  
393 studies, however, point out the transcriptional activator of ribosomal genes, Sfp1, as  
394 a regulator of *PDI1* (45, 46), suggesting coordination between the cytosolic protein  
395 synthesis machinery and ER localized oxidative folding (Figure 6).

396

397 The Hac1-mediated induction of the UPR occurs via binding to UPR response  
398 elements, UPREs. Previous research has shown that there are at least three different  
399 UPREs, with the expression of associated target genes being dependent not only on  
400 Hac1 activity, but also by Gcn4 expression, the downstream target of Gcn2 (47). It has  
401 also been shown that the removal of protein kinase Gcn2, blocks the expression of  
402 UPR genes independently of *HAC1* splicing upon oxidative folding stress (47). Other  
403 studies indicate however that Hac1 binds independently of other factors to at least two  
404 of the UPREs (48). Specifically, *KAR2* contains the UPRE referred to as UPRE-1 in  
405 its promotor (47) and so does the promotor of *JEM1* in the strain we used. Their  
406 downregulation is thus coherent with the reduced *HAC1* mRNA splicing observed in  
407 B184 *gcn2* $\Delta$  (Figure 4A). Based on our results, the expression of *KAR2* and *JEM1*  
408 correlate with the *HAC1* mRNA splicing ratio indicating that the UPRE-1 mediated  
409 expression of those genes is neither influenced by Gcn2 nor Gcn4 activity.

410

411 *Removal of the Gcn2 kinase and its impact on H<sub>2</sub>O<sub>2</sub> levels .*

412 Interestingly, we could demonstrate that the removal of the protein kinase Gcn2 in  
413 B184 leads to a decrease in intracellular H<sub>2</sub>O<sub>2</sub> levels, even though  $\alpha$ -amylase  
414 production is higher (Figure 5A, 1A, 3A). H<sub>2</sub>O<sub>2</sub> is a byproduct of the iterative process  
415 of forming correct disulfide bridges in proteins (28, 49). One could therefore assume  
416 that more protein produced would lead to a higher level of H<sub>2</sub>O<sub>2</sub>. However, H<sub>2</sub>O<sub>2</sub> levels  
417 in the ER may be maintained mostly independently of cytosolic H<sub>2</sub>O<sub>2</sub> levels (50). In  
418 agreement with our data suggesting that H<sub>2</sub>O<sub>2</sub> is potentially originating outside of the  
419 ER, while still interfering with ER oxidative homeostasis, mitochondrially-derived H<sub>2</sub>O<sub>2</sub>  
420 has been shown to increase cytosolic H<sub>2</sub>O<sub>2</sub> levels in ERAD deficient cells (28).

421

422 We find also that reduced levels of cytosolic H<sub>2</sub>O<sub>2</sub> in cells lacking Gcn2 correlate with  
423 the upregulation of several anti-oxidant genes such as *TSA1*, *TRX2*, *SRX1* and *fRMsr*  
424 (Figure 5A & 5B). Trx2 is a thioredoxin and is known to reduce cytosolic 2-Cys  
425 peroxiredoxins like Tsa1, whilst Srx1 is a sulfiredoxin that reactivates hyperoxidized  
426 Tsa1 (51). Interestingly, in support for an importance of Gcn2 in the anti-oxidant  
427 response, this protein has previously been shown to be required for high-level  
428 translation of the *SRX1* mRNA (51). Furthermore, *TSA1*, *TRX2*, and *SRX1* are all  
429 known targets of Yap1, a transcription factor that responds to elevated H<sub>2</sub>O<sub>2</sub> levels  
430 (52–54). These genes' increased expression therefore suggest that Yap1 may be  
431 activated in B184 *gcn2*Δ while producing recombinant α-amylase. Previous work by  
432 Delic et al, showed that by overexpressing *YAP1* the redox balance of the cytosol in a  
433 recombinant protein producing *P. pastoris* strain was restored (55).

434

435 With the findings in this study, we conclude that in two strains engineered for optimized  
436 protein production, the protein kinase Gcn2 is responsible for mediating a negative  
437 feedback loop affecting both cytosolic translation and the secretory pathway. By  
438 removing this H<sub>2</sub>O<sub>2</sub>-mediated feedback loop recombinant protein production is  
439 improved, indicating that the reduction of translation via endogenous oxidants can limit  
440 the productivity of yeast cells. The active protein kinase Gcn2 negatively affects  
441 several processes in the cell including ER stress and H<sub>2</sub>O<sub>2</sub> levels. Such findings are  
442 relevant for the engineering of production hosts for biotechnological production  
443 processes but also in basic research through the understanding of feedback loops  
444 present in multiple biological systems.

445

446 **Materials** **and** **Methods**  
447 **Strains** **and** **plasmids**

448 Three previously constructed *S. cerevisiae* strains were used in this study. CEN.PK  
449 530.1CK [*MAT $\alpha$  URA3 HIS3 LAU2 TRP1 SUC2 MAL2-8<sup>c</sup> tpi1(41-707)*] further referred  
450 to as AACK. Previous studies have engineered AACK to improve protein production  
451 leading to two strains, B184 and K17 (5, 34). B184 is generated by UV mutagenesis  
452 and K17 has the following genotype AACK [ *$\Delta$ hda2  $\Delta$ vps5  $\Delta$ tda3 PGK1p-COG5*  
453  *$\Delta$ gos1:: amdSYM-TEF1p-PDI1*]. AACK, B184, and K17 additionally have a disrupted  
454 *TPI1* gene. To complement this deficiency, we use the pAlphaAmyCPOT plasmid with  
455 an expression cassette for  $\alpha$ -amylase. This cassette has a  $\alpha$ -leader sequence and an  
456  $\alpha$ -amylase gene from *Aspergillus oryzae* (42). As a control, an empty CPOT plasmid  
457 was used. The *GCN2* gene was disrupted with help of plasmid pECAS9-gRNA-kanMX  
458 which contains both a cas9 gene and a gRNA expression cassette (56). The plasmids  
459 pECAS9-gRNA-kanMX-GCN2 and pECAS9-gRNA-kanMX-URA3 were made using  
460 the pECAS9-gRNA-kanMX-tHFD1 as the template (56). First, the backbone was  
461 obtained by linearizing pECAS9-gRNA-kanMX-tHFD1 by digestion with MunI and  
462 EcoRI. The 'left' fragment was constructed with primer #54 in combination with either  
463 #53 (*GCN2*) or #61 (*URA3*) and the 'right' fragment was constructed with primer #55  
464 in combination with either #52 (*GCN2*) or #60 (*URA3*). The correct assembly of the  
465 plasmids was confirmed by sequencing using primer #42. The genomic deletion was  
466 verified using primers pairs #38 and #39 for *GCN2* and #40 and #41 for *URA3*. The  
467 gRNA, repair fragments, and verification primers can be found in the Supplementary  
468 data for *GCN2* and *URA3* genes (Table S1). The plasmids used in this study can be  
469 found in Table S3. *E. coli* DH5 $\alpha$  was used for plasmid amplification.

## 471 **Media**                                      **and**                                      **culture**                                      **conditions**

472 Media used for *S. cerevisiae* strain construction were YPD, YPE, YPEG, SD-URA.

473 The experiments were always performed at 30 °C and 220 rpm. YPD medium

474 contained 10 g/L yeast extract, 20 g/L peptone, and 20 g/L glucose and was used for

475 all cultures unless otherwise mentioned. For the selection of the kanMX marker on the

476 CRISPR plasmid, 200 mg/L G418 (Formedium, Hunstanton, UK) was added to the

477 YPD medium. The YPE medium contained 10 g/L yeast extract, 20 g/L peptone, 20

478 g/L absolute ethanol and was solely used as a solid medium. For liquid cultivations 30

479 g/L glycerol was added to YPE and the medium was referred to as YPEG. Both YPE

480 and YPEG were only used for *S. cerevisiae* strains without CPOT plasmids since those

481 are unable to ferment glucose as the sole carbon source (57). SD-URA contained 20

482 g/L glucose, 6.7 g/L yeast nitrogen base without amino acids, and 0.77 g/L complete

483 supplement mixture without uracil (CSM-URA, Formedium) This medium was only

484 used to verify the deletion of the *URA3* gene. To solidify media 20 g/L agar (Merck

485 Millipore) was added. The protein expression and physiological experiments were

486 performed in SD2XSCAA media with glutamine instead of glutamate. SD-2XSCAA

487 medium contained 20 g/L glucose, 6.9 g/L yeast nitrogen base without amino acids,

488 190 mg/L Arg, 400 mg/L Asp, 1260 mg/L Gln, 130 mg/L Gly, 140 mg/L His, 290 mg/L

489 Ile, 400 mg/L Leu, 440 mg/L Lys, 108 mg/L Met, 200 mg/L Phe, 220 mg/L Thr, 40 mg/L

490 Trp, 52 mg/L Tyr, 380 mg/L Val, 1 g/L BSA, 5.4 g/L Na<sub>2</sub>HPO<sub>4</sub>, and 8.56 g/L

491 NaH<sub>2</sub>PO<sub>4</sub>·H<sub>2</sub>O and had a pH of 6.4.

492

493 Characterization of the roGFP2 sensors was performed in Delft synthetic medium (58)

494 and the verification of the luciferase expression in defined synthetic medium lacking

495 uracil, using 14 mL cultivation tubes (59). Protein production experiments and *GCN4*

496 expression experiments were performed at 30°C at 220 rpm in aerated 24-wells plates  
497 CR1224 (Bioscreen) with a volume of 2.5 mL and a start OD<sub>600</sub> of 0.01. All other  
498 experiments were grown in 100 mL shake flasks with 10 mL SD2xSCAA medium and  
499 a starting OD<sub>600</sub> of 0.01. The cultures for qPCR analysis were grown in a volume of 20  
500 mL with a starting OD<sub>600</sub> of 0.01. *E. coli* cells were grown in Luria-Bertani (LB) media  
501 at 37°C and 200 rpm. Selection medium contained 80 mg/L Ampicillin. The  
502 transformation procedure used for *E.coli* was according to a known protocol (60).

### 503 **Molecular biology techniques**

504 *S. cerevisiae* strains were transformed according to the protocol using the Li/Ac SS  
505 carrier method (61). 500 ng of DNA was used for the transformation of plasmids and  
506 an additional 1 µg repair fragment when required. To verify deletions or test for the  
507 presence of the CPOT plasmids colony PCR was performed using SapphireAmp fast  
508 PCR mix (TaKaRa Bio). For DNA construction, Phusion High Fidelity DNA polymerase  
509 (Thermo Scientific) was used. Restriction digestion was performed using FastDigest  
510 (Thermo Scientific) products. All techniques were used according to the manufactures  
511 protocols unless otherwise stated.

### 512 **α-Amylase assay**

513 Cells were harvested after 24 h, 48 h, and 96 h respectively. Cells were pelleted by  
514 centrifugation at 4°C, 8000 rpm for 5 min, then the supernatant was used for the α-  
515 amylase quantification assay. The Ceralpha kit (Megazyme) was used with α-amylase  
516 from *Aspergillus oryzae* as the standard. The assay was performed according to the  
517 manufacture's protocol with an exception on the preparation of buffer A. Since the  
518 protein was dissolved in the media, instead of preparing buffer A and dissolving  
519 solidified protein, we used a mixture of media and Milli Q water, depending on the

520 concentration of  $\alpha$ -amylase, to make buffer A with the correct concentration and  
521 protein. We used either a dilution of 200X or 400X depending on the concentration of  
522  $\alpha$ -amylase in the media.

### 523 **Growth** **profiler**

524 The *S. cerevisiae* strains were cultivated for 48 h in 250  $\mu$ L SD2xSCAA medium at  
525 30°C and 1200 rpm in 96-well plates (Enzyscreen CR1496d). Growth curves were  
526 measured using a Growth Profiler 960 (Enzyscreen). Three independent colonies per  
527 strain were grown in 1 mL SD2XSCAA media in 7 mL cultivation tubes after an  
528 overnight culture. The cells were then inoculated in technical triplicates with a starting  
529 OD<sub>600</sub> of 0.005.

### 530 **Microbioreactor** **cultures**

531 *S. cerevisiae* strains were cultivated for 96 h in 1 mL SD2xSCAA media at 30 °C and  
532 1200 rpm in 'Flowerplates' The characterization of the sensors was performed in Delft  
533 minimal media and the experiments in SD2xSCAA media. Three independent colonies  
534 per strain were grown in 1 mL SD2XSCAA media in 7 mL cultivation tubes after an  
535 overnight culture. Cells were then inoculated in technical duplicates with a starting  
536 OD<sub>600</sub> of 0.005. For measuring the biomass, excitation and emission at 600 nm was  
537 used with gain 20, for the oxidation of cysteine, an excitation at 405 nm and emission  
538 at 520 nm with gain 100 was used and for the reduction of cysteine, an excitation at  
539 488 nm and emission at 520 nm with gain 100. All wells were measured every 20 min  
540 by a Biolector microbioreactor system (M2p-Labs).

541

542 **Ox/Red** **ratio** **determination**

543 Background fluorescence was determined using strains carrying an empty p416  
544 vector. We used biological duplicates of these controls with technical duplicates. The  
545 natural fluorescence per strain was determined at both 405 nm (Ox) and 488 nm (Red).  
546 For both wavelengths, the average of the natural fluorescence was determined. These  
547 average values were subtracted from the Ox and Red measurements of all the  
548 separate replicates with the roGFP2 sensors. The GFP signals with the natural  
549 fluorescence subtracted were used to determine the Ox/Red ratio per replicate per  
550 strain. The final Ox/Red ratio was determined by taking the average of the ratios per  
551 strain. R Studio software was used for all data analysis (62) .

552 **qPCR**

553 Cells were harvested after 24 h and 48 h respectively, cells were then instantly cooled  
554 on ice and centrifuged at 4°C, 6000 rpm for 3 min. The supernatant was discarded,  
555 and the pellet was snap-frozen using liquid nitrogen. For RNA extraction, the RNeasy  
556 Kit (Qiagen) was used according to the manufacturers protocol. For cDNA synthesis,  
557 the Quantitect Reverse Transcriptase Kit (Qiagen) was used. For the qPCR, the  
558 DyNaMo ColorFlash SYBR Green qPCR Kit was used. All primers listed (Table S2?)  
559 were verified using the MIQE guidelines with *ACT1* used as the reference gene.

560

561 **Puromycin** **treatment**

562 Yeast cells were grown in SD2xSCAA and grown until the mid-exponential phase  
563 ( $OD_{600} \sim 1$ ). Cells were then normalized to  $OD_{600} 1$ , then harvested and collected by  
564 centrifugation before being incubated in 100 mL PBS with 1 mM puromycin for 10 min  
565 at 30°C, 220 rpm. Cells were then collected by centrifugation, and intracellular proteins



566 were extracted as described previously (63). 10  $\mu$ L of the cell extracts were then used  
567 for SDS-page and Western Blot analysis.

568 **eIF2 $\alpha$  protein extraction**

569 For the intracellular protein extraction of the elongation factor eIF2 $\alpha$ , protein extraction  
570 with LiAc/NaOH was performed as in (64). 5 OD<sub>600</sub> of yeast cells were harvested after  
571 24 h and 48 h or and 10 OD<sub>600</sub> at 72 h and 96 h. 10  $\mu$ L of the cell extracts was then  
572 used for SDS-page and Western Blot analysis.

573 **Western blotting**

574 Samples and controls were loaded on and separated with Stain free 4-20% gels (Bio-  
575 rad). Proteins were transferred onto 0.45 micron PVDF membranes (Bio-rad) using  
576 the Trans-Blot Turbo transfer system (Bio-rad). The blot was blocked using Western  
577 blocker solution (Sigma Aldrich) and incubated in either anti-total eIF2 $\alpha$  (1:1000) or  
578 anti-puromycin (1:1000), or eIF2 $\alpha$ -phosphorylated (Ser-51; Invitrogen; 1:1000)  
579 followed by incubation with either anti-mouse (1:5000) or anti-rabbit (1:5000). Both  
580 secondary antibodies are HRP-conjugated and were visualized using West Pico Plus  
581 HRP substrate (Thermo Fischer) and measured with a ChemidoC XRS image  
582 analyzer (Bio-Rad).

583

584 **Viability measurements**

585 Cell viability was measured using propidium iodide (Invitrogen) staining as described  
586 previously (63). Samples were taken after 1, 2, 3, 4, and 13 days of cultivation in 10  
587 mL of SD2xSCAA media. Fluorescence was measured with a Guava easyCyte 8HT  
588 system (Merck Millipore). For each sample, 5000 cells were counted. The cultivations

589 were performed in biological triplicate and unstained cells were used as a negative  
590 control for the fluorescence measurements.

591

### 592 **GCN4 activity assay**

593 The luciferase construct was tested in a *S. cerevisiae* BY4742 strain in which the  
594 pVW31 plasmid was transformed. Three biological replicas were cultivated in 7 mL  
595 cultivation tubes to which 10 mM (final concentration) 3-AT was added and incubated  
596 for 30 min. The luminescence was checked before and after the addition of 3-AT. For  
597 the *GCN4* expression experiment, cells were harvested after 24 h and 48 h. 2 mL of  
598 culture was centrifugated for 5 min at 35000 rpm at 4°C. The supernatant was then  
599 discarded, and cells washed in 1 mL cold water. Cells were resuspended in 300 µL  
600 PBS buffer with protease inhibitors and added to lysis matrix tubes (MP Bio). The  
601 mixture was Fast prepped at 5000 rpm for 20 sec 3 times with incubation of the  
602 samples on ice between runs. The mixture was then centrifuged for 10 min at max  
603 speed at 4°C and 100 µL of clear supernatant was harvested and stored at -20°C.  
604 Luminescence was measured with a FluoStar Omega plate reader (BMG  
605 Labtechnologies) and treated with the protocol and reagents of the Dual-Luciferase  
606 Reporter Assay System (Promega). All reagents were used accordingly to the  
607 manufactures protocol.

608

### 609 **Acknowledgments**

610 The authors thank Dr. Xin Chen for the help with the flow cytometer and qPCR setup  
611 and operations.

612

613 **Funding**

614 The work was supported by the VINNOVA center CellNova (2017-02105) and ÅForsk.

615

616

617

618

619 **References.**

- 620 1. Huang M, Bao J, Nielsen J. 2014. Biopharmaceutical protein production by  
621 *Saccharomyces cerevisiae* : current state and future prospects. Pharm  
622 Bioprocess 2:167–182.
- 623 2. Nielsen J. 2013. Production of biopharmaceutical proteins by yeast: Advances  
624 through metabolic engineering. Bioengineered 4:207–211.
- 625 3. Wang G, Huang M, Nielsen J. 2017. Exploring the potential of *Saccharomyces*  
626 *cerevisiae* for biopharmaceutical protein production. Curr Opin Biotechnol  
627 48:77–84.
- 628 4. Besada-Lombana PB, Da Silva NA. 2019. Engineering the early secretory  
629 pathway for increased protein secretion in *Saccharomyces cerevisiae*. Metab  
630 Eng 55:142–151.
- 631 5. Huang M, Wang G, Qin J, Petranovic D, Nielsen J. 2018. Engineering the  
632 protein secretory pathway of *Saccharomyces cerevisiae* enables improved  
633 protein production. Proc Natl Acad Sci U S A 115:E11025–E11032.
- 634 6. Bao J, Huang M, Petranovic D, Nielsen J. 2017. Moderate expression of  
635 SEC16 increases protein secretion by *Saccharomyces cerevisiae*. Appl  
636 Environ Microbiol 83:E03400–E03416.
- 637 7. Robinson AS, Hines V, Wittrup KD. 1994. Protein disulfide isomerase  
638 overexpression increases secretion of foreign proteins in *Saccharomyces*  
639 *cerevisiae*. Bio/Technology 12:381–384.
- 640 8. de Ruijter JC, Koskela E V., Frey AD. 2016. Enhancing antibody folding and  
641 secretion by tailoring the *Saccharomyces cerevisiae* endoplasmic reticulum.  
642 Microb Cell Fact 15:87.
- 643 9. Hou J, Tyo K, Liu Z, Petranovic D, Nielsen J. 2012. Engineering of vesicle  
644 trafficking improves heterologous protein secretion in *Saccharomyces*  
645 *cerevisiae*. Metab Eng 14:120–127.
- 646 10. Idiris A, Tohda H, Kumagai H, Takegawa K. 2010. Engineering of protein  
647 secretion in yeast: Strategies and impact on protein production. Appl Microbiol  
648 Biotechnol 86:403–417.
- 649 11. de Ruijter JC, Koskela E V., Nandania J, Frey AD, Velagapudi V. 2018.  
650 Understanding the metabolic burden of recombinant antibody production in  
651 *Saccharomyces cerevisiae* using a quantitative metabolomics approach. Yeast  
652 35:331–341.
- 653 12. Tang H, Bao X, Shen Y, Song M, Wang S, Wang C, Hou J. 2015. Engineering  
654 protein folding and translocation improves heterologous protein secretion in  
655 *Saccharomyces cerevisiae*. Biotechnol Bioeng 112:1872–1882.
- 656 13. Xia X. 2019. Translation control of HAC1 by regulation of splicing in  
657 *Saccharomyces cerevisiae*. Int J Mol Sci 20:2860.
- 658 14. Castilho BA, Shanmugam R, Silva RC, Ramesh R, Himme BM, Sattlegger E.  
659 2014. Keeping the eIF2 alpha kinase Gcn2 in check. Biochim Biophys Acta -  
660 Mol Cell Res 1843:1948–1968.
- 661 15. Harding HP, Zhang Y, Zeng H, Novoa I, Lu PD, Calfon M, Sadri N, Yun C,  
662 Popko B, Paules R, Stojdl DF, Bell JC, Hettmann T, Leiden JM, Ron D. 2003.  
663 An integrated stress response regulates amino acid metabolism and  
664 resistance to oxidative stress. Mol Cell 11:619–633.
- 665 16. Postnikoff SDL, Johnson JE, Tyler JK. 2017. The integrated stress response in  
666 budding yeast lifespan extension. Microb Cell 4:368–375.
- 667 17. Yang R, Wek SA, Wek RC. 2000. Glucose Limitation Induces GCN4  
668 Translation by Activation of Gcn2 Protein Kinase. Mol Cell Biol

- 669 <https://doi.org/10.1128/mcb.20.8.2706-2717.2000>.
- 670 18. Rolfes RJ, Hinnebusch AG. 1993. Translation of the yeast transcriptional  
671 activator *GCN4* is stimulated by purine limitation: implications for activation of  
672 the protein kinase *GCN2*. *Mol Cell Biol* 12:5099–5111.
- 673 19. Wek SA, Zhu S, Wek RC. 1995. The histidyl-tRNA synthetase-related  
674 sequence in the eIF-2 alpha protein kinase *GCN2* interacts with tRNA and is  
675 required for activation in response to starvation for different amino acids. *Mol*  
676 *Cell Biol* 15:4497–4506.
- 677 20. Ashe MP, De Long SK, Sachs AB. 2000. Glucose depletion rapidly inhibits  
678 translation initiation in yeast. *Mol Biol Cell* 11:833–848.
- 679 21. Shenton D, Smirnova JB, Selley JN, Carroll K, Hubbard SJ, Pavitt GD, Ashe  
680 MP, Grant CM. 2006. Global translational responses to oxidative stress impact  
681 upon multiple levels of protein synthesis. *J Biol Chem* 281:29011–29021.
- 682 22. Madeo F, Fröhlich E, Ligr M, Grey M, Sigrist SJ, Wolf DH, Fröhlich KU. 1999.  
683 Oxygen stress: A regulator of apoptosis in yeast. *J Cell Biol* 145:757–767.
- 684 23. Bodvard K, Peeters K, Roger F, Romanov N, Igbaria A, Welkenhuysen N,  
685 Palais G, Reiter W, Toledano MB, Käll M, Molin M. 2017. Light-sensing via  
686 hydrogen peroxide and a peroxiredoxin. *Nat Commun* 14:757–767.
- 687 24. Giorgio M, Trinei M, Migliaccio E, Pelicci PG. 2007. Hydrogen peroxide: A  
688 metabolic by-product or a common mediator of ageing signals? *Nat Rev Mol*  
689 *Cell Biol* 8:722–728.
- 690 25. Morano KA, Grant CM, Moye-Rowley WS. 2012. The response to heat shock  
691 and oxidative stress in *Saccharomyces cerevisiae*. *Genetics* 190:1157–1195.
- 692 26. Malhotra JD, Miao H, Zhang K, Wolfson A, Pennathur S, Pipe SW, Kaufman  
693 RJ. 2008. Antioxidants reduce endoplasmic reticulum stress and improve  
694 protein secretion. *Proc Natl Acad Sci U S A* 105:18525–18530.
- 695 27. Malinouski M, Zhou Y, Belousov V V., Hatfield DL, Gladyshev VN. 2011.  
696 Hydrogen peroxide probes directed to different cellular compartments. *PLoS*  
697 *One* 6:e14564.
- 698 28. Haynes CM, Titus EA, Cooper AA. 2004. Degradation of misfolded proteins  
699 prevents ER-derived oxidative stress and cell death. *Mol Cell* 15:767–776.
- 700 29. Morgan B, Van Laer K, Owusu TNE, Ezeriņa D, Pastor-Flores D, Amponsah  
701 PS, Tursch A, Dick TP. 2016. Real-time monitoring of basal H<sub>2</sub>O<sub>2</sub> levels with  
702 peroxiredoxin-based probes. *Nat Chem Biol* 12:437–443.
- 703 30. Murphy MP, Holmgren A, Larsson NG, Halliwell B, Chang CJ, Kalyanaraman  
704 B, Rhee SG, Thornalley PJ, Partridge L, Gems D, Nyström T, Belousov V,  
705 Schumacker PT, Winterbourn CC. 2011. Unraveling the biological roles of  
706 reactive oxygen species. *Cell Metab* 13:361–366.
- 707 31. Dabirian Y, Li X, Chen Y, David F, Nielsen J, Siewers V. 2019. Expanding the  
708 Dynamic Range of a Transcription Factor-Based Biosensor in *Saccharomyces*  
709 *cerevisiae*. *ACS Synth Biol* 8:1968–1975.
- 710 32. Stöcker S, Maurer M, Ruppert T, Dick TP. 2018. A role for 2-Cys  
711 peroxiredoxins in facilitating cytosolic protein thiol oxidation. *Nat Chem Biol*  
712 14:148–155.
- 713 33. Staudacher V, Trujillo M, Diederichs T, Dick TP, Radi R, Morgan B, Deponte  
714 M. 2018. Redox-sensitive GFP fusions for monitoring the catalytic mechanism  
715 and inactivation of peroxiredoxins in living cells. *Redox Biol* 14:549–556.
- 716 34. Huang M, Bai Y, Sjostrom SL, Hallström BM, Liu Z, Petranovic D, Uhlén M,  
717 Joensson HN, Andersson-Svahn H, Nielsen J. 2015. Microfluidic screening  
718 and whole-genome sequencing identifies mutations associated with improved

- 719 protein secretion by yeast. *Proc Natl Acad Sci U S A* 112:E4689–E4696.
- 720 35. Huang M, Bao J, Hallström BM, Petranovic D, Nielsen J. 2017. Efficient protein  
721 production by yeast requires global tuning of metabolism. *Nat Commun*  
722 8:1131.
- 723 36. Schmidt EK, Clavarino G, Ceppi M, Pierre P. 2009. SUnSET, a nonradioactive  
724 method to monitor protein synthesis. *Nat Methods* 6:275–277.
- 725 37. Hinnebusch AG. 2005. Translational regulation of *GCN4* and the general  
726 amino acid control of yeast. *Annu Rev Microbiol* 59:407–450.
- 727 38. Yang R, Wek SA, Wek RC. 2000. Glucose Limitation Induces *GCN4*  
728 Translation by Activation of Gcn2 Protein Kinase. *Mol Cell Biol* 20:2706–2717.
- 729 39. Natarajan K, Meyer MR, Jackson BM, Slade D, Roberts C, Hinnebusch AG,  
730 Marton MJ. 2001. Transcriptional Profiling Shows that Gcn4p Is a Master  
731 Regulator of Gene Expression during Amino Acid Starvation in Yeast. *Mol Cell*  
732 *Biol* 21:4347–4368.
- 733 40. Steffen KK, MacKay VL, Kerr EO, Tsuchiya M, Hu D, Fox LA, Dang N,  
734 Johnston ED, Oakes JA, Tchao BN, Pak DN, Fields S, Kennedy BK,  
735 Kaeberlein M. 2008. Yeast Life Span Extension by Depletion of 60S  
736 Ribosomal Subunits Is Mediated by Gcn4. *Cell* 133:292–302.
- 737 41. Hinnebusch AG, Natarajan K. 2002. Gcn4p, a master regulator of gene  
738 expression, is controlled at multiple levels by diverse signals of starvation and  
739 stress. *Eukaryot Cell* 1:22–32.
- 740 42. Liu Z, Tyo KEJ, Martínez JL, Petranovic D, Nielsen J. 2012. Different  
741 expression systems for production of recombinant proteins in *Saccharomyces*  
742 *cerevisiae*. *Biotechnol Bioeng* 109:1259–1268.
- 743 43. Maity S, Rajkumar A, Matai L, Bhat A, Ghosh A, Agam G, Kaur S, Bhatt NR,  
744 Mukhopadhyay A, Sengupta S, Chakraborty K. 2016. Oxidative Homeostasis  
745 Regulates the Response to Reductive Endoplasmic Reticulum Stress through  
746 Translation Control. *Cell Rep* 16:851–865.
- 747 44. Topf U, Suppanz I, Samluk L, Wrobel L, Böser A, Sakowska P, Knapp B,  
748 Pietrzyk MK, Chacinska A, Warscheid B. 2018. Quantitative proteomics  
749 identifies redox switches for global translation modulation by mitochondrially  
750 produced reactive oxygen species. *Nat Commun* 9:324.
- 751 45. Cipollina C, van den Brink J, Daran-Lapujade P, Pronk JT, Porro D, de Winde  
752 JH. 2008. *Saccharomyces cerevisiae SFP1*: At the crossroads of central  
753 metabolism and ribosome biogenesis. *Microbiology* 154:1686–1699.
- 754 46. Hu Z, Killion PJ, Iyer VR. 2007. Genetic reconstruction of a functional  
755 transcriptional regulatory network. *Nat Genet* 39:683–687.
- 756 47. Patil CK, Li H, Walter P. 2004. Gcn4p and novel upstream activating  
757 sequences regulate targets of the unfolded protein response. *PLoS Biol*  
758 2:e246.
- 759 48. Fordyce PM, Pincus D, Kimmig P, Nelson CS, El-Samad H, Walter P, DeRisi  
760 JL. 2012. Basic leucine zipper transcription factor Hac1 binds DNA in two  
761 distinct modes as revealed by microfluidic analyses. *Proc Natl Acad Sci U S A*  
762 109:E3084–E3093.
- 763 49. Malhotra JD, Kaufman RJ. 2007. Endoplasmic reticulum stress and oxidative  
764 stress: A vicious cycle or a double-edged sword? *Antioxidants Redox Signal*  
765 9:2277–2293.
- 766 50. Konno T, Melo EP, Lopes C, Mehmeti I, Lenzen S, Ron D, Avezov E. 2015.  
767 ERO1-independent production of H<sub>2</sub>O<sub>2</sub> within the endoplasmic reticulum fuels  
768 Prdx4-mediated oxidative protein folding. *J Cell Biol* 211:253–259.

- 769 51. Molin M, Yang J, Hanzén S, Toledano MB, Labarre J, Nyström T. 2011. Life  
770 Span Extension and H<sub>2</sub>O<sub>2</sub> Resistance Elicited by Caloric Restriction Require  
771 the Peroxiredoxin Tsa1 in *Saccharomyces cerevisiae*. *Mol Cell* 43:823–833.
- 772 52. Stephen DWS, Rivers SL, Jamieson DJ. 1995. The role of the *YAP1* and  
773 *YAP2* genes in the regulation of the adaptive oxidative stress responses of  
774 *Saccharomyces cerevisiae*. *Mol Microbiol* 16:415–423.
- 775 53. Jamieson DJ. 1998. Oxidative stress responses of the yeast *Saccharomyces*  
776 *cerevisiae*. *Yeast* 14:1511–1527.
- 777 54. Delaunay A, Pflieger D, Barrault MB, Vinh J, Toledano MB. 2002. A thiol  
778 peroxidase is an H<sub>2</sub>O<sub>2</sub> receptor and redox-transducer in gene activation. *Cell*  
779 111:471–481.
- 780 55. Delic M, Graf AB, Koellensperger G, Haberhauer-Troyer C, Hann S,  
781 Mattanovich D, Gasser B. 2014. Overexpression of the transcription factor  
782 Yap1 modifies intracellular redox conditions and enhances recombinant  
783 protein secretion. *Microb Cell* 11:376–386.
- 784 56. Zhu Z, Zhou YJ, Kang MK, Krivoruchko A, Buijs NA, Nielsen J. 2017. Enabling  
785 the synthesis of medium chain alkanes and 1-alkenes in yeast. *Metab Eng*  
786 44:81–88.
- 787 57. Compagno C, Brambilla L, Capitanio D, Boschi F, Ranzi BM, Porro D. 2001.  
788 Alterations of the glucose metabolism in a triose phosphate isomerase-  
789 negative *Saccharomyces cerevisiae* mutant. *Yeast* 18:663–670.
- 790 58. Verduyn C, Postma E, Scheffers WA, Van Dijken JP. 1992. Effect of benzoic  
791 acid on metabolic fluxes in yeasts: A continuous-culture study on the  
792 regulation of respiration and alcoholic fermentation. *Yeast* 8:501–517.
- 793 59. Molin M, Renault JP, Lagniel G, Pin S, Toledano M, Labarre J. 2007. Ionizing  
794 radiation induces a Yap1-dependent peroxide stress response in yeast. *Free*  
795 *Radic Biol Med* 43:136–144.
- 796 60. Inoue H, Nojima H, Okayama H. 1990. High efficiency transformation of  
797 *Escherichia coli* with plasmids. *Gene* 96:23–28.
- 798 61. Gietz RD, Schiestl RH. 2007. High-efficiency yeast transformation using the  
799 LiAc/SS carrier DNA/PEG method. *Nat Protoc* 2:31–34.
- 800 62. RStudio Team (2021). RStudio: Integrated Development Environment for R.
- 801 63. Chen X, Petranovic D. 2015. Amyloid-β peptide-induced cytotoxicity and  
802 mitochondrial dysfunction in yeast. *FEMS Yeast Res* 15:fov061.
- 803 64. Zhang T, Lei J, Yang H, Xu K, Wang R, Zhang Z. 2011. An improved method  
804 for whole protein extraction from yeast *Saccharomyces cerevisiae*. *Yeast*  
805 28:795–768.
- 806  
807  
808  
809

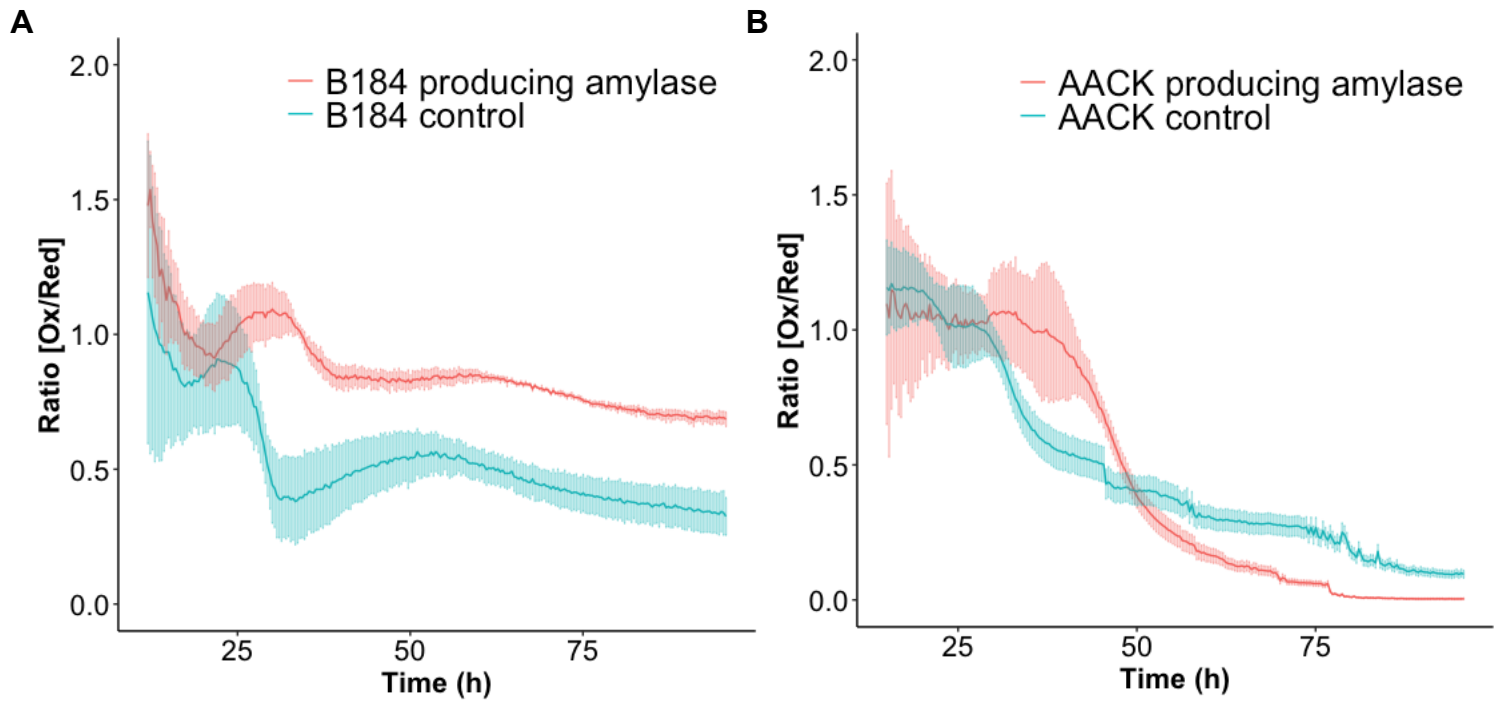

**Figure 1.  $\alpha$ -Amylase production leads to higher levels of intracellular  $H_2O_2$  in the engineered high-level production strain B184.**

(Ox/Red) ratios over 96 h of cultivation for B184 and AACK measured with plasmid based roGFP-*PRX1*. B184 (A) and AACK (B) expressing  $\alpha$ -amylase (red) and the control without expressing  $\alpha$ -amylase (green). The light bars represent the standard deviations of three biological replicates and two technical replicates. The first 15 h were excluded due to too low signal.



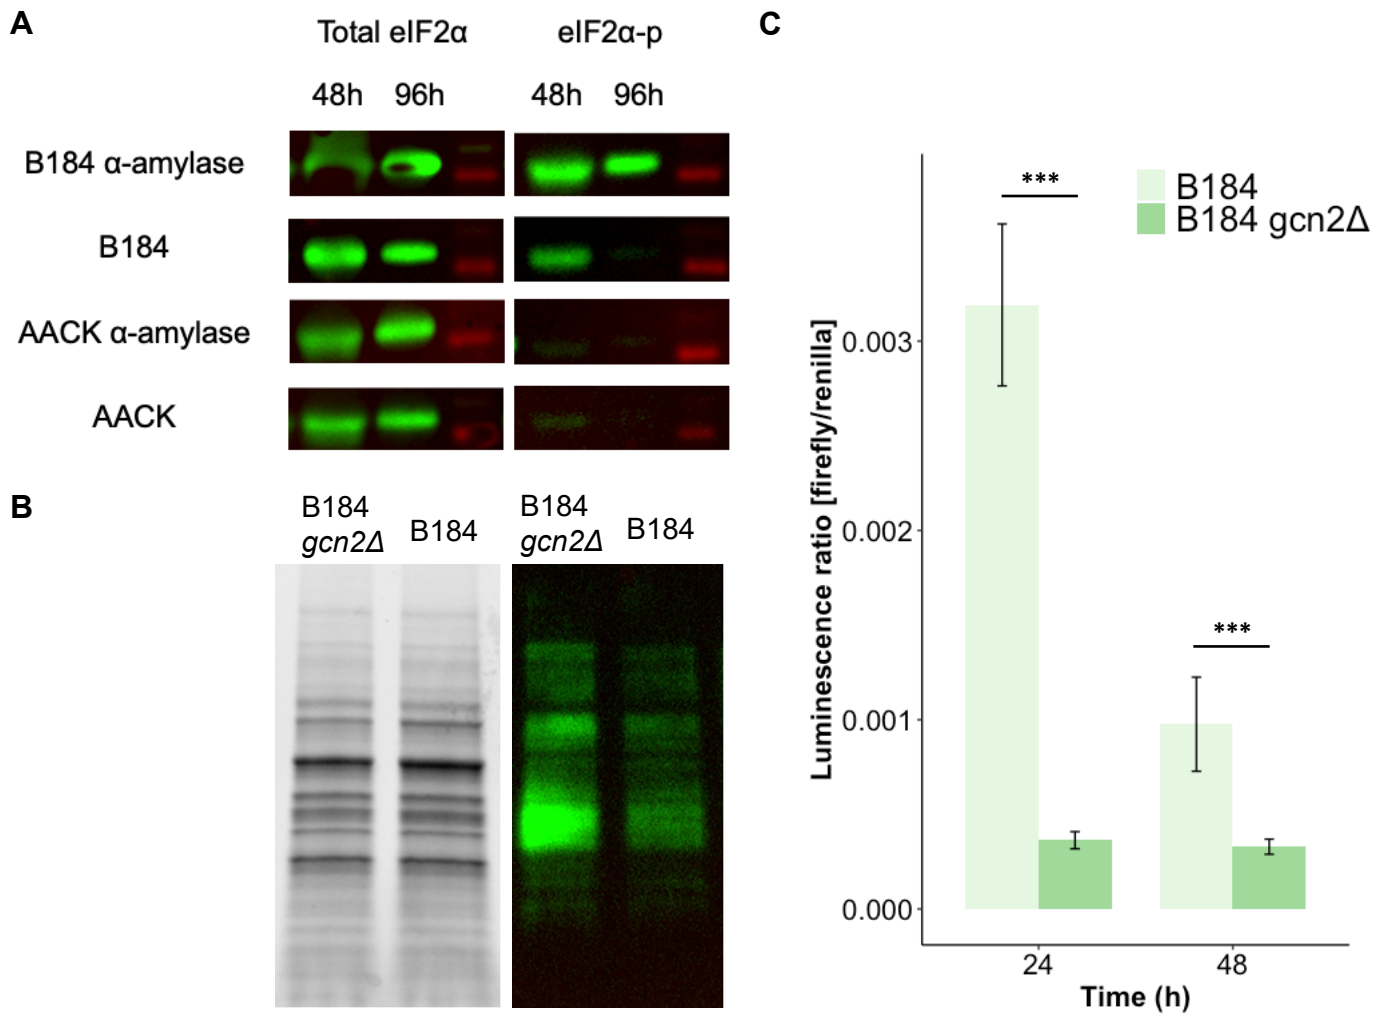

**Figure 2. The protein kinase Gcn2 is active in the high-level production strain B184 under  $\alpha$ -amylase expressing conditions. Upon removal of the *GCN2* kinase *GCN4* expression is reduced and overall translation is increased.**

**(A)** Western blot of total eIF2 $\alpha$  and eIF2 $\alpha$ -phosphorylated. **(B)** Reducing SDS-page and Western blot of B184 *gcn2* $\Delta$  and B184 with primary antibody against puromycin during the exponential growth phase (OD=1). **(C)** *GCN4* expression assay based on a Firefly Renilla Luciferase Assay. The firefly luciferase gene is expressed under the control of the *GCN4* promoter and the renilla luciferase gene is under the control of the constitutive *PGK1* promoter. The luminescence ratio of firefly luciferase / renilla luciferase represents the normalized *GCN4* expression. *GCN4* expression levels in B184 (light green) and B184 *gcn2* $\Delta$  (green) after 24 and 48 h. Significance was determined using t-test with equal sample variance. Data are based on three biological replicates. \* indicates  $P > 0.05$ , \*\* indicates  $P > 0.01$  and \*\*\* indicates  $P > 0.005$  and the errors bars show the standard deviation.

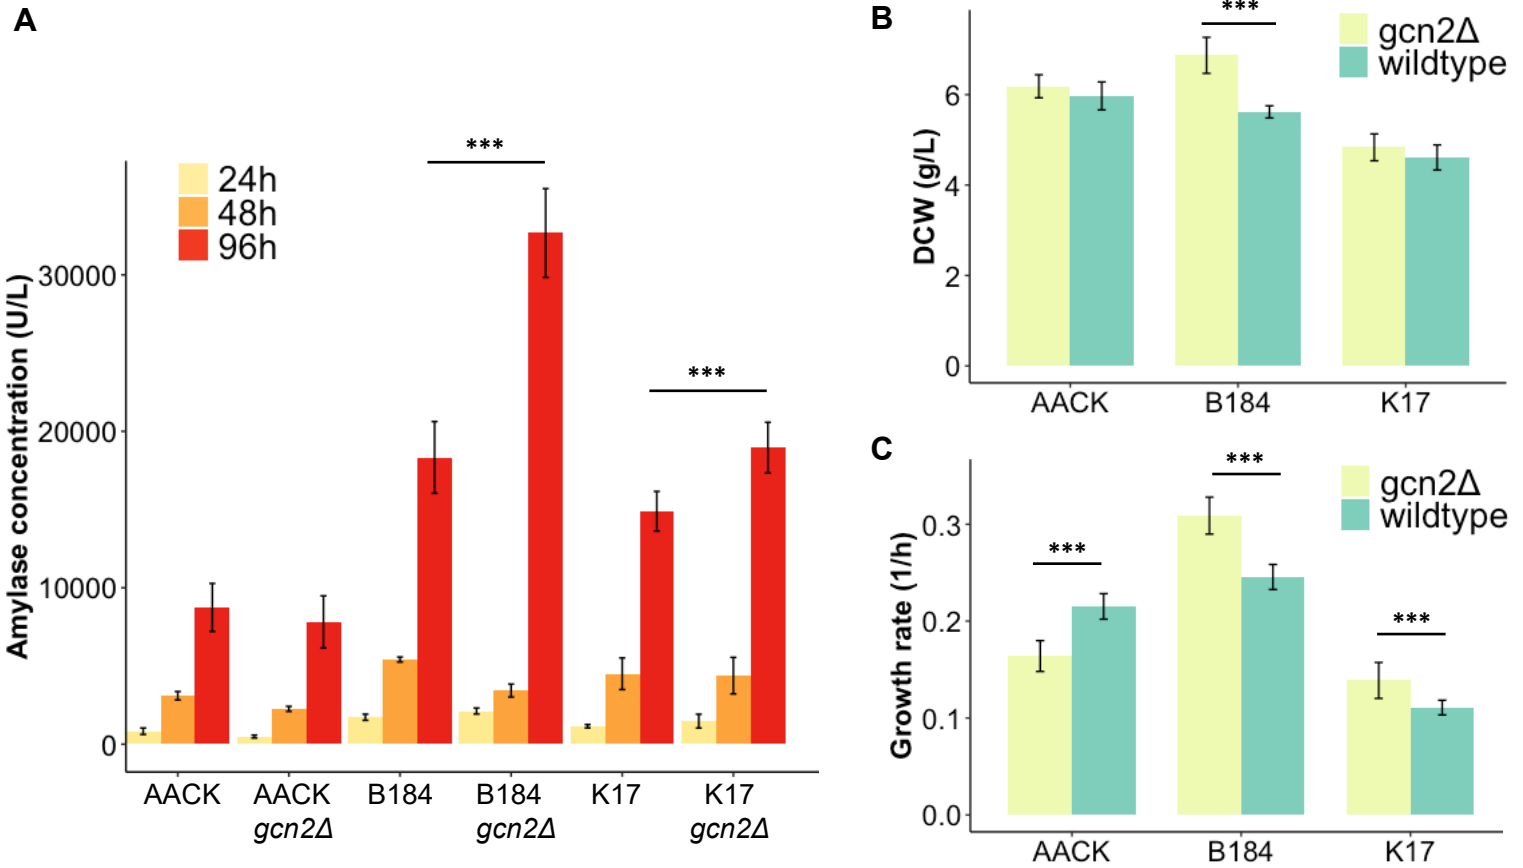

**Figure 3. Removal of the protein kinase Gcn2 increases the  $\alpha$ -amylase titer and improves growth parameters in two engineered high-level protein production strains.**

**(A)**  $\alpha$ -Amylase concentration in the media after 24 (yellow), 48 (orange) and 96 (red) h of cultivations indicated with enzymatic assay, Data are the average of three biological replicates and two technical replicates. The significance is for the samples at 96 h. **(B)** Dry weight measurements after 96 h of cultivation in 24-well plates with the strains with intact *GCN2* (light green) and *GCN2* removed (green). Data is the average of three biological replicas and two technical replicas. **(C)** Exponential growth rates in 96-well plates with the strains with intact *GCN2* (light green) and *GCN2* removed (green). Data are the average of three biological replicates and three technical replicas. Significance was determined using t-test with equal sample variance. \* indicates  $P > 0.05$ , \*\* indicates  $P > 0.01$  and \*\*\* indicates  $P > 0.005$  and the errors bars show the standard deviation.

**A**

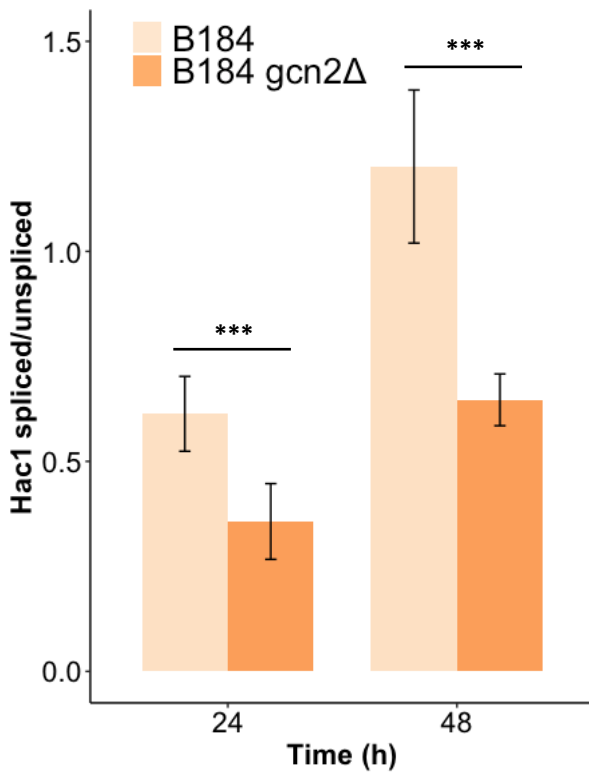

**B**

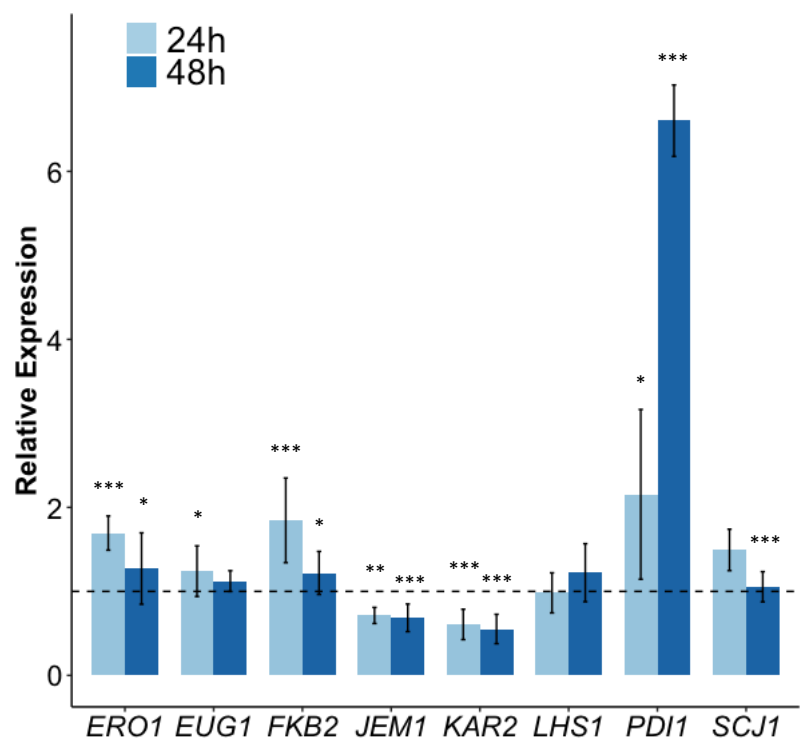

**Figure 4. Removal of the eIF2 kinase Gcn2 reduces HAC1 mRNA splicing while the expression of PDI1 is strongly increased.**

For all the mRNA samples 3 biological and 3 technical replicates were included. **(A)** Ratio of spliced / unspliced HAC1 mRNA. The ratio is determined per sample based on the  $\Delta C_t$  of the spliced and the  $\Delta C_t$  of the unspliced HAC1 mRNA. It shows the Hac1 splicing of B184 (light orange) and B184 *gcn2Δ* (dark orange) after 24 h and 48 h. Significance is determined by difference of the ratios of the splicing between the two strains. Data are based on three biological with three technical replicates. Significance was determined using t-test with equal sample variance. **(B)** Expression levels of mRNA of UPR determined by qPCR. The data are analyzed using the  $\Delta\Delta C_t$  method and the data points indicate the relative expression of the genes encoding UPR-target proteins in B184 *gcn2Δ* compared to B184. The dashed line visualizes 1. For all the genes the mRNA was analyzed at 24 h (light blue) and at 48 h (dark blue). Significance is determined by the difference of the  $\Delta C_t$  per gene between the two strains. \* indicates  $P > 0.05$ , \*\* indicates  $P > 0.01$  and \*\*\* indicates  $P > 0.005$  and the errors bars show the standard deviation.

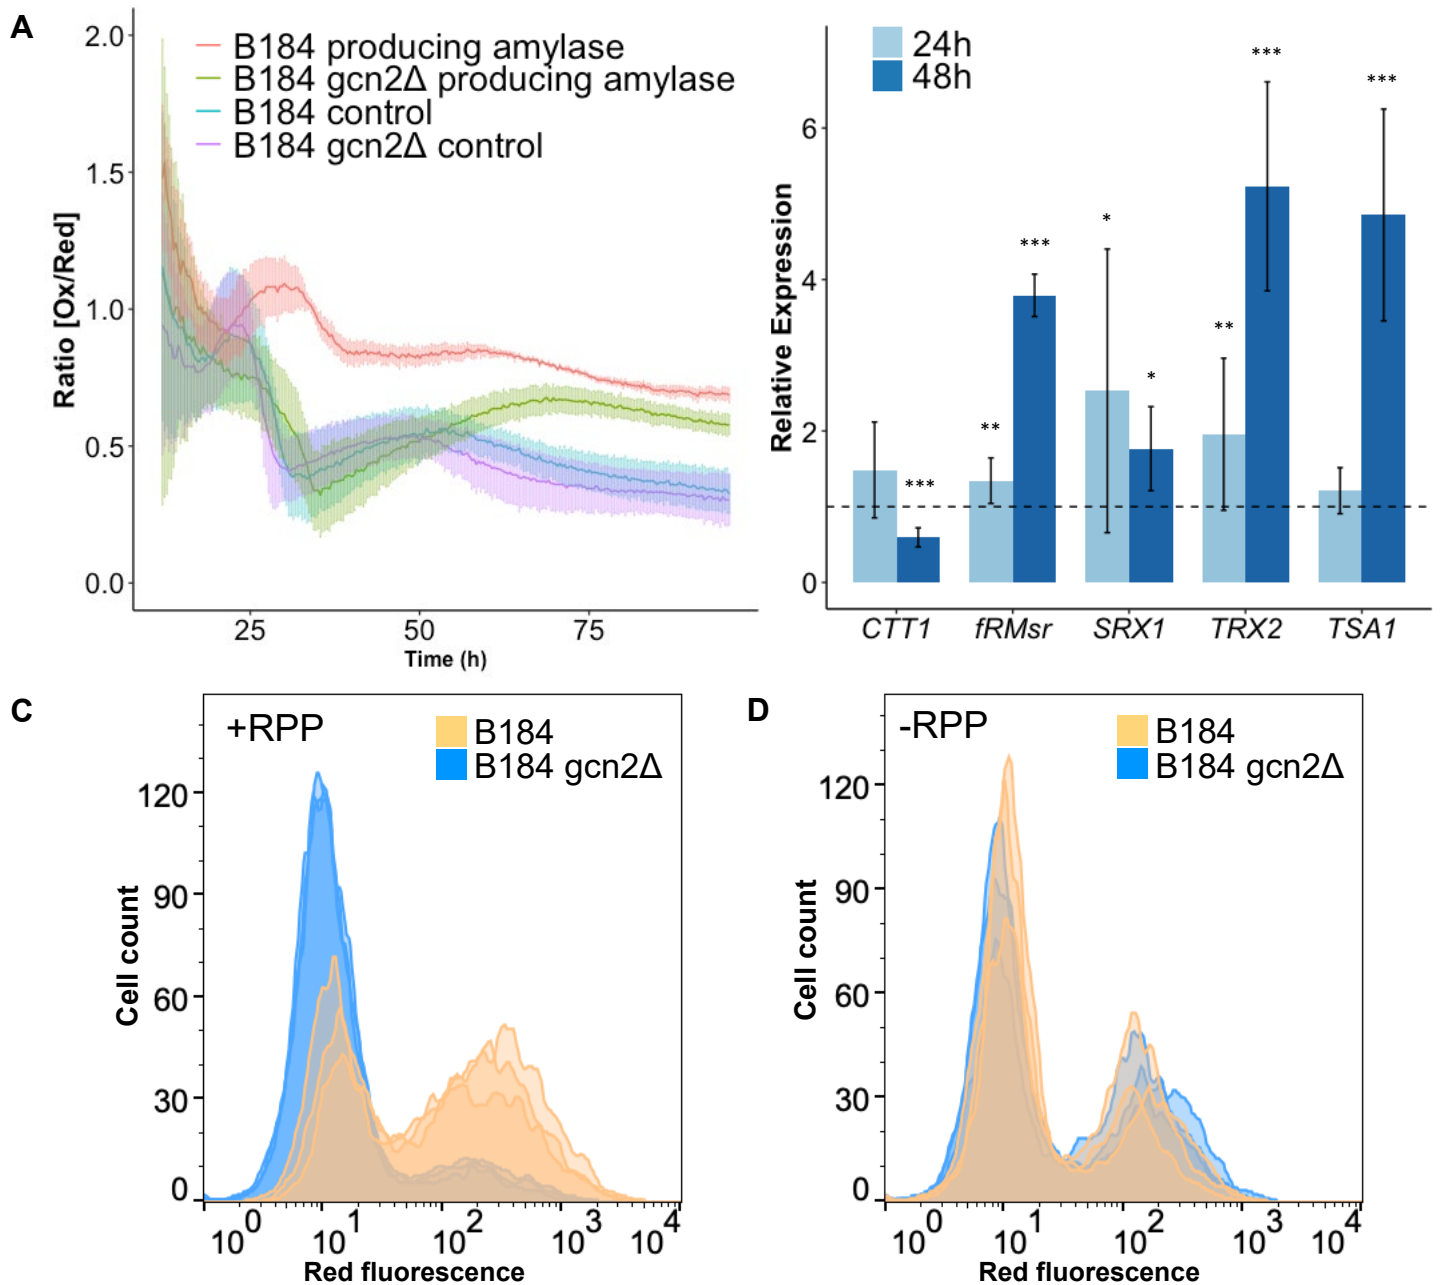

**Figure 5. Removal of the protein kinase Gcn2 reduces H<sub>2</sub>O<sub>2</sub> levels in B184 producing  $\alpha$ -amylase, increases mRNA abundance of several antioxidant proteins and improves long time survival.** (A) (Ox/Red) ratios over 96 h of cultivation for B184 measured with plasmid based roGFP-PRX1. B184 expressing  $\alpha$ -amylase (red), B184 *gcn2Δ* expressing  $\alpha$ -amylase (green), B184 without expressing  $\alpha$ -amylase (blue) and B184 *gcn2Δ* without expressing  $\alpha$ -amylase (purple). The light bars represent the standard deviations of three biological replicates and two technical replicates. The first 15 h were excluded due to too low signal. (B) Expression levels of mRNA of UPR determined by qPCR. The data were analyzed using the  $\Delta\Delta C_t$  method and the data points indicate the relative expression of the genes encoding anti-oxidant proteins in B184 *gcn2Δ* compared to B184. The dashed line visualizes 1. For all the genes the mRNA was analyzed at 24 h (light blue) and at 48 h (dark blue). Significance was determined by the difference of the  $\Delta C_t$  per gene between the two strains. Data are based on three biological with three technical replicates. Significance was determined using t-test with equal sample variance. \* indicates  $P > 0.05$ , \*\* indicates  $P > 0.01$  and \*\*\* indicates  $P > 0.005$ . Survival measured with PI staining in combination with flow cytometry after 13 days of cultivation. Flow cytometry histograms with B184 (orange) and B184 *gcn2Δ* (blue) expressing recombinant  $\alpha$ -amylase (C) and without recombinant protein production (D), the figures contain three biological replicates per strain.

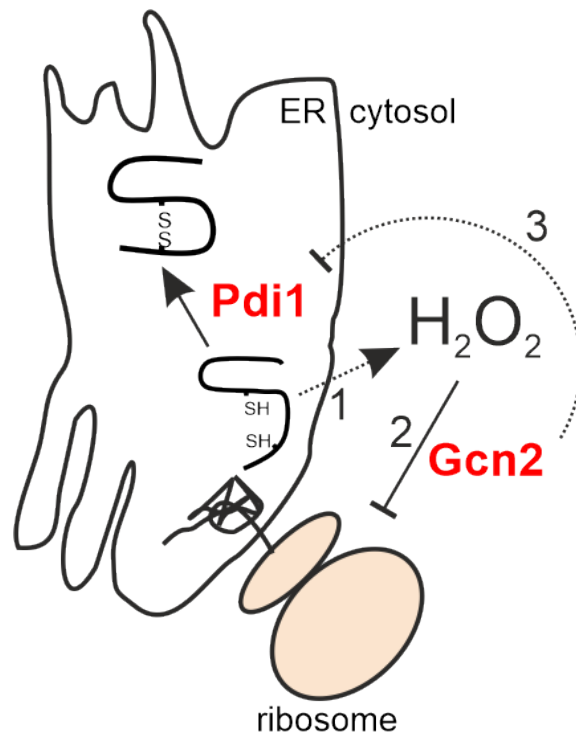

**Figure 6. Model of mechanisms by which Gcn2 affects protein synthesis and ER oxidative folding.**

Recombinant protein production leads to the accumulation of H<sub>2</sub>O<sub>2</sub> in the cytosol via an unknown mechanism (1). H<sub>2</sub>O<sub>2</sub> activates the translation initiation factor (eIF2) kinase Gcn2 (2) causing the repression of protein synthesis. Through an unclear mechanism Gcn2 also appears to exert an inhibitory effect on both anti-oxidant expression and *PDI1* transcription (3), suggesting that cytosolic protein synthesis is coordinated with ER oxidative folding.
